# Supplementary material
Source: PubMed Central journal article supplement (PMC7309609)
Supplement: IAI.00207-20-s0001.pdf [file IAI.00207-20-s0001.pdf]

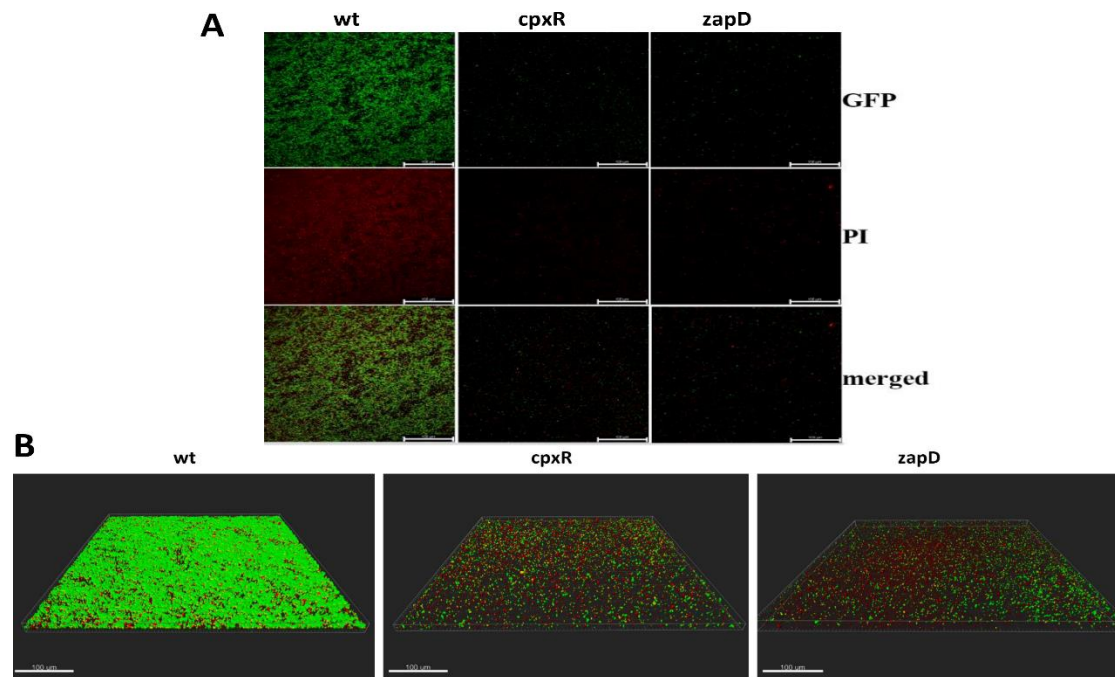

**Supplementary Fig 1. Confocal scanning laser microscopy (CSLM) images of *P. mirabilis* biofilm.** (A) The biofilms of *GFPuv*-tagged wild-type, *zapD* mutant and *cpxR* mutant at 24 h were washed and stained with propidium iodide (PI) to label eDNA. Shown are representative CSLM images of the wild-type and mutants. (B) The biofilms of *GFPuv*-tagged wild-type, *zapD* mutant and *cpxR* mutant at 24 h were stained with propidium iodide (PI) and three-dimensional images of the biofilms were reconstructed by Imaris software (Bitplane, Zurich, Switzerland). Only representative merged images are shown. Red, PI-stained; green, GFP-stained; wt, wild-type; *zapD*, *zapD* mutant; *cpxR*, *cpxR* mutant; scale bar, 100  $\mu$  m.
